# Supplementary material for: Effect of Intensive Compared With Standard Glycemia Treatment Strategies on Mortality by Baseline Subgroup Characteristics: The Action to Control Cardiovascular Risk in Diabetes (ACCORD) trial
Source: PubMed Central journal article supplement — Diabetes Care. 2010 Jan 26;33(4):721–7. doi: 10.2337/dc09-1471 (PMC2845012; doi:10.2337/dc09-1471), 2010-01-26
Supplement: supp_dc09-1471_dc09-1471_online_appendix.pdf [file supp_dc09-1471_dc09-1471_online_appendix.pdf]

ON-LINE APPENDIX Table 1. Risk of death(all-cause) in Intensive vs Standard Glycemia within Demographic Categories

|                          | Intensive Glycemia |          |          | Standard Glycemia |          |          | Hazard Ratio | Lower 95% CI | Upper 95% CI | P-value w/in subgroup | P-value interaction |
|--------------------------|--------------------|----------|----------|-------------------|----------|----------|--------------|--------------|--------------|-----------------------|---------------------|
|                          | N                  | # Deaths | % Deaths | N                 | # Deaths | % Deaths |              |              |              |                       |                     |
| Overall                  | 5128               | 257      | 5.01%    | 5123              | 203      | 3.96%    | 1.217        | 1.012        | 1.463        | 0.0368                |                     |
| AGE                      |                    |          |          |                   |          |          |              |              |              |                       |                     |
| Age < 65                 | 3397               | 125      | 3.68%    | 3382              | 87       | 2.57%    | 1.387        | 1.054        | 1.824        | 0.0194                |                     |
| Age 65-69                | 938                | 57       | 6.08%    | 947               | 46       | 4.86%    | 1.233        | 0.835        | 1.821        | 0.2914                |                     |
| Age 70-74                | 516                | 40       | 7.75%    | 537               | 38       | 7.08%    | 1.014        | 0.649        | 1.586        | 0.9506                |                     |
| Age 75+                  | 277                | 35       | 12.64%   | 257               | 32       | 12.45%   | 0.901        | 0.554        | 1.466        | 0.6753                | 0.4049              |
| SEX                      |                    |          |          |                   |          |          |              |              |              |                       |                     |
| Women                    | 1983               | 75       | 3.78%    | 1969              | 57       | 2.89%    | 1.233        | 0.873        | 1.741        | 0.2340                |                     |
| Male                     | 3145               | 182      | 5.79%    | 3154              | 146      | 4.63%    | 1.210        | 0.973        | 1.504        | 0.0870                | 0.9169              |
| HOME STATUS              |                    |          |          |                   |          |          |              |              |              |                       |                     |
| Live Alone               | 1031               | 56       | 5.43%    | 1047              | 50       | 4.78%    | 1.086        | 0.741        | 1.593        | 0.6711                |                     |
| Live With Others         | 4096               | 201      | 4.91%    | 4075              | 153      | 3.75%    | 1.254        | 1.016        | 1.548        | 0.0350                | 0.5679              |
| RACE                     |                    |          |          |                   |          |          |              |              |              |                       |                     |
| Caucasian                | 3194               | 178      | 5.57%    | 3199              | 141      | 4.41%    | 1.217        | 0.975        | 1.518        | 0.0819                |                     |
| Hispanic                 | 358                | 10       | 2.79%    | 380               | 16       | 4.21%    | 0.602        | 0.272        | 1.328        | 0.2085                |                     |
| Afr-American             | 996                | 52       | 5.22%    | 956               | 29       | 3.03%    | 1.597        | 1.013        | 2.518        | 0.0440                |                     |
| Asian/Other              | 580                | 17       | 2.93%    | 588               | 17       | 2.89%    | 1.055        | 0.537        | 2.073        | 0.8755                | 0.2139              |
| CLINICAL CENTER NETWORK  |                    |          |          |                   |          |          |              |              |              |                       |                     |
| Canadian                 | 752                | 39       | 5.19%    | 755               | 28       | 3.71%    | 1.330        | 0.818        | 2.164        | 0.2502                |                     |
| Western                  | 863                | 35       | 4.06%    | 877               | 32       | 3.65%    | 1.088        | 0.673        | 1.758        | 0.7307                |                     |
| Minn/Iowa                | 623                | 26       | 4.17%    | 619               | 22       | 3.55%    | 1.162        | 0.658        | 2.051        | 0.6049                |                     |
| Ohio/MI                  | 785                | 33       | 4.2%     | 784               | 27       | 3.44%    | 1.185        | 0.712        | 1.973        | 0.5134                |                     |
| Northeast                | 608                | 32       | 5.26%    | 610               | 24       | 3.93%    | 1.266        | 0.745        | 2.150        | 0.3834                |                     |
| Southeast                | 775                | 36       | 4.65%    | 775               | 23       | 2.97%    | 1.446        | 0.856        | 2.443        | 0.1678                |                     |
| VA Network               | 722                | 56       | 7.76%    | 703               | 47       | 6.69%    | 1.101        | 0.747        | 1.623        | 0.6271                | 0.9828              |
| BODY MASS INDEX          |                    |          |          |                   |          |          |              |              |              |                       |                     |
| BMI < 30                 | 1918               | 92       | 4.8%     | 1901              | 81       | 4.26%    | 1.095        | 0.811        | 1.477        | 0.5540                |                     |
| BMI 30-34                | 1675               | 77       | 4.6%     | 1690              | 72       | 4.26%    | 1.046        | 0.758        | 1.443        | 0.7841                |                     |
| BMI 35+                  | 1532               | 87       | 5.68%    | 1529              | 49       | 3.2%     | 1.700        | 1.197        | 2.413        | 0.0030                | 0.0778              |
| WAIST CIRCUMFERENCE (CM) |                    |          |          |                   |          |          |              |              |              |                       |                     |
| Waist Circ < 96.69       | 1275               | 52       | 4.08%    | 1271              | 47       | 3.7%     | 1.073        | 0.723        | 1.593        | 0.7270                |                     |
| Waist Circ 96.69-106.60  | 1225               | 46       | 3.76%    | 1253              | 52       | 4.15%    | 0.872        | 0.586        | 1.297        | 0.4977                |                     |
| Waist Circ 106.60-116    | 1277               | 64       | 5.01%    | 1286              | 51       | 3.97%    | 1.214        | 0.840        | 1.756        | 0.3019                |                     |
| Waist Circ >116          | 1297               | 88       | 6.78%    | 1267              | 49       | 3.87%    | 1.661        | 1.171        | 2.357        | 0.0045                | 0.1003              |
| EDUCATION                |                    |          |          |                   |          |          |              |              |              |                       |                     |

ON-LINE APPENDIX Table 1. Risk of death(all-cause) in Intensive vs Standard Glycemia within Demographic Categories

|                                | Intensive Glycemia |          |          | Standard Glycemia |          |          | Hazard Ratio | Lower 95% CI | Upper 95% CI | P-value w/in subgroup | P-value interaction |
|--------------------------------|--------------------|----------|----------|-------------------|----------|----------|--------------|--------------|--------------|-----------------------|---------------------|
|                                | N                  | # Deaths | % Deaths | N                 | # Deaths | % Deaths |              |              |              |                       |                     |
| Educ: < HS                     | 804                | 47       | 5.85%    | 717               | 43       | 6%       | 0.912        | 0.602        | 1.379        | 0.6612                |                     |
| Educ: HS grad                  | 1338               | 75       | 5.61%    | 1366              | 61       | 4.47%    | 1.215        | 0.866        | 1.704        | 0.2591                |                     |
| Educ: some college/tech        | 1673               | 81       | 4.84%    | 1684              | 56       | 3.33%    | 1.412        | 1.004        | 1.987        | 0.0473                |                     |
| Educ: college grad or more     | 1309               | 53       | 4.05%    | 1353              | 43       | 3.18%    | 1.192        | 0.797        | 1.784        | 0.3924                | 0.4465              |
| YEAR RANDOMIZED INTO THE STUDY |                    |          |          |                   |          |          |              |              |              |                       |                     |
| Rand 2001                      | 597                | 62       | 10.39%   | 577               | 57       | 9.88%    | 0.988        | 0.689        | 1.418        | 0.9485                |                     |
| Rand 2003                      | 1573               | 96       | 6.1%     | 1591              | 76       | 4.78%    | 1.252        | 0.926        | 1.692        | 0.1440                |                     |
| Rand 2004                      | 1601               | 69       | 4.31%    | 1591              | 39       | 2.45%    | 1.715        | 1.158        | 2.539        | 0.0071                |                     |
| Rand 2005                      | 1357               | 30       | 2.21%    | 1364              | 31       | 2.27%    | 0.909        | 0.549        | 1.507        | 0.7128                | 0.1698              |

ON-LINE APPENDIX Table 2. Risk of death(all-cause) in Intensive vs Standard Glycemia w/in Medical History

|                                                    | Intensive Glycemia |          |          | Standard Glycemia |          |          | Hazard Ratio | Lower 95% CI | Upper 95% CI | P-value w/in subgroup | P-value interaction |
|----------------------------------------------------|--------------------|----------|----------|-------------------|----------|----------|--------------|--------------|--------------|-----------------------|---------------------|
|                                                    | N                  | # Deaths | % Deaths | N                 | # Deaths | % Deaths |              |              |              |                       |                     |
| Overall                                            | 5128               | 257      | 5.01%    | 5123              | 203      | 3.96%    | 1.217        | 1.012        | 1.463        | 0.0368                |                     |
| PRIOR CARDIOVASCULAR DISEASE                       |                    |          |          |                   |          |          |              |              |              |                       |                     |
| Prior CVD: Yes                                     | 1825               | 139      | 7.62%    | 1783              | 101      | 5.66%    | 1.286        | 0.995        | 1.663        | 0.0542                |                     |
| Prior CVD: No                                      | 3303               | 118      | 3.57%    | 3340              | 102      | 3.05%    | 1.145        | 0.878        | 1.492        | 0.3183                | 0.5327              |
| PRIOR HEART FAILURE/CHF                            |                    |          |          |                   |          |          |              |              |              |                       |                     |
| Prior Heart Failure/CHF                            | 249                | 35       | 14.06%   | 245               | 25       | 10.2%    | 1.040        | 0.619        | 1.748        | 0.8824                |                     |
| No Prior Heart Failure/CHF                         | 4836               | 219      | 4.53%    | 4835              | 169      | 3.5%     | 1.261        | 1.032        | 1.541        | 0.0236                | 0.7061              |
| DIABETES DURATION (years)                          |                    |          |          |                   |          |          |              |              |              |                       |                     |
| Diab Dur 0-5                                       | 1474               | 64       | 4.34%    | 1455              | 62       | 4.26%    | 0.969        | 0.683        | 1.375        | 0.8601                |                     |
| Diab Dur 6-10                                      | 1472               | 68       | 4.62%    | 1459              | 46       | 3.15%    | 1.392        | 0.957        | 2.024        | 0.0837                |                     |
| Diab Dur 11-15                                     | 971                | 42       | 4.33%    | 987               | 33       | 3.34%    | 1.216        | 0.770        | 1.920        | 0.4023                |                     |
| Diab Dur 16+                                       | 1163               | 80       | 6.88%    | 1178              | 61       | 5.18%    | 1.352        | 0.968        | 1.888        | 0.0765                | 0.4461              |
| SELF-REPORTED HISTORY OF NEUROPATHY/NERVE PROBLEMS |                    |          |          |                   |          |          |              |              |              |                       |                     |
| Hist of Neuropathy:Yes                             | 1327               | 104      | 7.84%    | 1410              | 58       | 4.11%    | 1.950        | 1.414        | 2.690        | <.0001                |                     |
| Hist of Neuropathy:No                              | 3708               | 152      | 4.1%     | 3646              | 140      | 3.84%    | 0.999        | 0.794        | 1.258        | 0.9957                | 0.0008              |
| PERIPHERAL NEUROPATHY ON FOOT EXAM                 |                    |          |          |                   |          |          |              |              |              |                       |                     |
| PeriNeuro on Exam:Yes                              | 2168               | 144      | 6.64%    | 2189              | 117      | 5.34%    | 1.195        | 0.936        | 1.526        | 0.1524                |                     |
| PeriNeuro on Exam:No                               | 2955               | 113      | 3.82%    | 2923              | 86       | 2.94%    | 1.246        | 0.941        | 1.649        | 0.1253                | 0.8386              |
| RETINAL SURGERY                                    |                    |          |          |                   |          |          |              |              |              |                       |                     |
| Retinal Surgery:Yes                                | 563                | 40       | 7.1%     | 608               | 43       | 7.07%    | 0.995        | 0.647        | 1.531        | 0.9824                |                     |
| Retinal Surgery:No                                 | 4511               | 212      | 4.7%     | 4460              | 158      | 3.54%    | 1.266        | 1.030        | 1.556        | 0.0251                | 0.3008              |
| VISUAL ACUITY SCORE                                |                    |          |          |                   |          |          |              |              |              |                       |                     |
| VisAcuity: <20/40                                  | 1163               | 83       | 7.14%    | 1174              | 69       | 5.88%    | 1.188        | 0.863        | 1.636        | 0.2902                |                     |
| VisAcuity: 20/20-20/40                             | 2958               | 138      | 4.67%    | 2990              | 112      | 3.75%    | 1.196        | 0.932        | 1.535        | 0.1600                |                     |
| VisAcuity: >=20/20                                 | 759                | 18       | 2.37%    | 751               | 11       | 1.46%    | 1.581        | 0.745        | 3.359        | 0.2330                | 0.8046              |
| SMOKING STATUS                                     |                    |          |          |                   |          |          |              |              |              |                       |                     |
| Never Smoker                                       | 2116               | 71       | 3.36%    | 2166              | 60       | 2.77%    | 1.170        | 0.829        | 1.651        | 0.3711                |                     |
| Former Smoker                                      | 2276               | 141      | 6.2%     | 2251              | 100      | 4.44%    | 1.361        | 1.053        | 1.759        | 0.0186                |                     |
| Current Smoker                                     | 730                | 43       | 5.89%    | 699               | 43       | 6.15%    | 0.883        | 0.578        | 1.350        | 0.5660                | 0.949               |
| HISTORY OF DEPRESSION                              |                    |          |          |                   |          |          |              |              |              |                       |                     |
| HistDepr:Yes                                       | 1196               | 57       | 4.77%    | 1225              | 54       | 4.41%    | 1.040        | 0.716        | 1.512        | 0.8357                |                     |
| HistDepr:No                                        | 3897               | 196      | 5.03%    | 3868              | 145      | 3.75%    | 1.290        | 1.041        | 1.600        | 0.0200                | 0.3831              |

ON-LINE APPENDIX Table 2. Risk of death(all-cause) in Intensive vs Standard Glycemia w/in Medical History

|                                       | Intensive Glycemia |          |          | Standard Glycemia |          |          |              |              |              |                       |                     |
|---------------------------------------|--------------------|----------|----------|-------------------|----------|----------|--------------|--------------|--------------|-----------------------|---------------------|
|                                       | N                  | # Deaths | % Deaths | N                 | # Deaths | % Deaths | Hazard Ratio | Lower 95% CI | Upper 95% CI | P-value w/in subgroup | P-value interaction |
| SYSTOLIC BLOOD PRESSURE               |                    |          |          |                   |          |          |              |              |              |                       |                     |
| SBP < 135                             | 2435               | 121      | 4.97%    | 2435              | 90       | 3.7%     | 1.306        | 0.994        | 1.717        | 0.0556                |                     |
| SBP 135+                              | 2668               | 135      | 5.06%    | 2668              | 112      | 4.2%     | 1.139        | 0.886        | 1.463        | 0.3103                | 0.204               |
| BASELINE ECG DETECTION OF PRIOR MI    |                    |          |          |                   |          |          |              |              |              |                       |                     |
| No prev MI on ECG                     | 4396               | 220      | 5%       | 4392              | 172      | 3.92%    | 1.235        | 1.012        | 1.508        | 0.0380                |                     |
| Prev MI on ECG                        | 226                | 12       | 5.31%    | 250               | 17       | 6.8%     | 0.682        | 0.324        | 1.434        | 0.3125                | 0.1251              |
| ANY MAJOR ABNORMALITY ON BASELINE ECG |                    |          |          |                   |          |          |              |              |              |                       |                     |
| No abnormality on ECG                 | 3443               | 137      | 3.98%    | 3455              | 113      | 3.27%    | 1.180        | 0.919        | 1.514        | 0.1937                |                     |
| Major abnormality on ECG              | 1161               | 93       | 8.01%    | 1166              | 75       | 6.43%    | 1.176        | 0.866        | 1.595        | 0.2988                | 0.9921              |
| ANY PRIOR AMPUTATION                  |                    |          |          |                   |          |          |              |              |              |                       |                     |
| Prior Amputation                      | 91                 | 11       | 12.09%   | 94                | 10       | 10.64%   | 1.249        | 0.519        | 3.009        | 0.6200                |                     |
| No Amputation                         | 5037               | 246      | 4.88%    | 5029              | 193      | 3.84%    | 1.222        | 1.012        | 1.476        | 0.0370                | 0.9253              |





ON-LINE APPENDIX Table 4. Risk of death(all-cause) in Intensive vs Standard Glycemia w/in Baseline Lab Values

|                             | Intensive Glycemia |          |          | Standard Glycemia |          |          | Hazard Ratio | Lower 95% CI | Upper 95% CI | P-value w/in subgroup | P-value interaction |
|-----------------------------|--------------------|----------|----------|-------------------|----------|----------|--------------|--------------|--------------|-----------------------|---------------------|
|                             | N                  | # Deaths | % Deaths | N                 | # Deaths | % Deaths |              |              |              |                       |                     |
| Overall                     | 5128               | 257      | 5.01%    | 5123              | 203      | 3.96%    | 1.226        | 1.020        | 1.474        | 0.0301                |                     |
| A1c                         |                    |          |          |                   |          |          |              |              |              |                       |                     |
| Hba1c < 7.5                 | 1036               | 50       | 4.83%    | 1022              | 45       | 4.4%     | 1.000        | 0.667        | 1.497        | 0.9982                |                     |
| Hba1c 7.5 to 8.4            | 2226               | 93       | 4.18%    | 2200              | 90       | 4.09%    | 1.001        | 0.749        | 1.338        | 0.9936                |                     |
| Hba1c 8.5+                  | 1857               | 114      | 6.14%    | 1887              | 68       | 3.6%     | 1.644        | 1.217        | 2.220        | 0.0012                | 0.0444              |
| LDL                         |                    |          |          |                   |          |          |              |              |              |                       |                     |
| LDL < 100                   | 2447               | 121      | 4.94%    | 2498              | 101      | 4.04%    | 1.204        | 0.924        | 1.568        | 0.1695                |                     |
| LDL 100-119                 | 1146               | 54       | 4.71%    | 1067              | 34       | 3.19%    | 1.445        | 0.940        | 2.221        | 0.0932                |                     |
| LDL 120+                    | 1508               | 82       | 5.44%    | 1525              | 65       | 4.26%    | 1.183        | 0.854        | 1.639        | 0.3132                | 0.793               |
| TRIGLYCERIDES               |                    |          |          |                   |          |          |              |              |              |                       |                     |
| TRIG < 300                  | 4435               | 225      | 5.07%    | 4448              | 176      | 3.96%    | 1.234        | 1.013        | 1.503        | 0.0370                |                     |
| TRIG 300+                   | 666                | 32       | 4.8%     | 642               | 24       | 3.74%    | 1.267        | 0.746        | 2.151        | 0.3813                | 0.9746              |
| HDL                         |                    |          |          |                   |          |          |              |              |              |                       |                     |
| HDL < 34                    | 1182               | 81       | 6.85%    | 1164              | 58       | 4.98%    | 1.335        | 0.953        | 1.871        | 0.0934                |                     |
| HDL 34-39                   | 1318               | 59       | 4.48%    | 1291              | 45       | 3.49%    | 1.207        | 0.819        | 1.781        | 0.3419                |                     |
| HDL 40-47                   | 1307               | 67       | 5.13%    | 1322              | 51       | 3.86%    | 1.273        | 0.884        | 1.833        | 0.1950                |                     |
| HDL 48+                     | 1294               | 50       | 3.86%    | 1313              | 46       | 3.5%     | 1.098        | 0.735        | 1.639        | 0.6479                | 0.8964              |
| SERUM CREATININE            |                    |          |          |                   |          |          |              |              |              |                       |                     |
| SCreat 0.1-1                | 3928               | 171      | 4.35%    | 3928              | 134      | 3.41%    | 1.236        | 0.986        | 1.550        | 0.0664                |                     |
| Screat >1                   | 1173               | 86       | 7.33%    | 1161              | 66       | 5.68%    | 1.231        | 0.893        | 1.698        | 0.2044                | 0.9847              |
| CALCULATED MDRD GFR         |                    |          |          |                   |          |          |              |              |              |                       |                     |
| GFR 15.3-75.3               | 1301               | 88       | 6.76%    | 1242              | 67       | 5.39%    | 1.178        | 0.856        | 1.620        | 0.3150                |                     |
| GFR 75.4-89.5               | 1256               | 51       | 4.06%    | 1288              | 53       | 4.11%    | 0.939        | 0.639        | 1.380        | 0.7479                |                     |
| GFR 89.6-105.1              | 1268               | 60       | 4.73%    | 1293              | 43       | 3.33%    | 1.393        | 0.941        | 2.063        | 0.0980                |                     |
| GFR 105.2+                  | 1276               | 58       | 4.55%    | 1266              | 37       | 2.92%    | 1.533        | 1.015        | 2.318        | 0.0425                | 0.3014              |
| ALBUMIN TO CREATININE RATIO |                    |          |          |                   |          |          |              |              |              |                       |                     |
| AlbCreatRatio < 30          | 3504               | 130      | 3.71%    | 3494              | 114      | 3.26%    | 1.115        | 0.867        | 1.435        | 0.3950                |                     |
| AlbCreatRatio 30-300        | 1260               | 89       | 7.06%    | 1241              | 59       | 4.75%    | 1.399        | 1.006        | 1.946        | 0.0461                |                     |
| AlbCreatRatio > 300         | 330                | 36       | 10.91%   | 343               | 29       | 8.45%    | 1.156        | 0.706        | 1.891        | 0.5645                | 0.548               |
